# Supplementary material for: HPLC-UV platform for trace analysis of three isomeric mononitrophenols in water with chitin based solid phase extraction
Source: Royal Society of Chemistry journal article supplement (doi:10.1039/c7ay01000a), 2017-01-01
Supplement: c7ay01000a1.pdf [file c7ay01000a1.pdf]

Supplementary Information

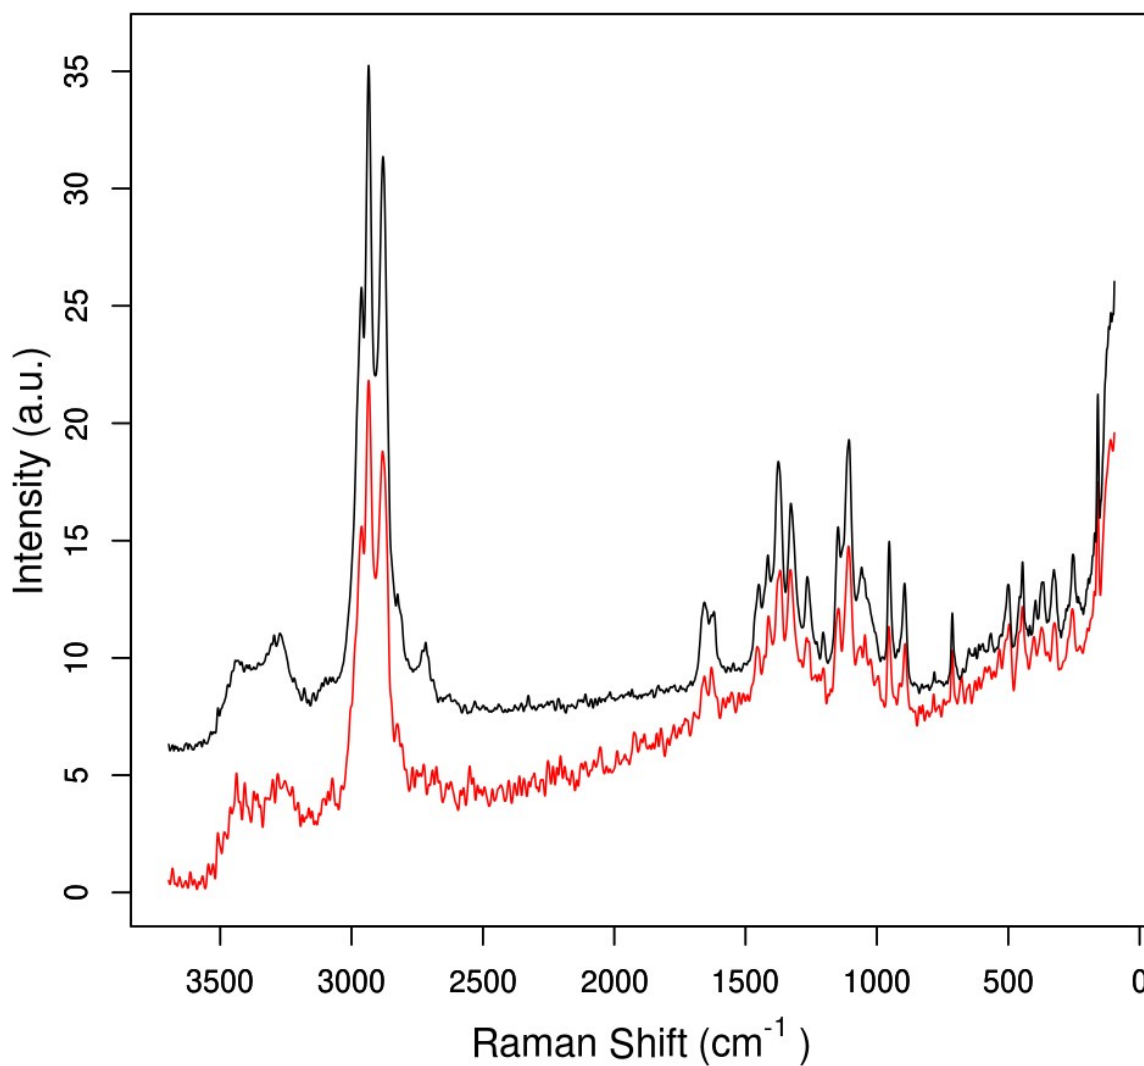

**Supplementary Figure 1 A:** FT-Raman spectra of chitin (black) and p-nitrophenol loaded chitin (red) powders

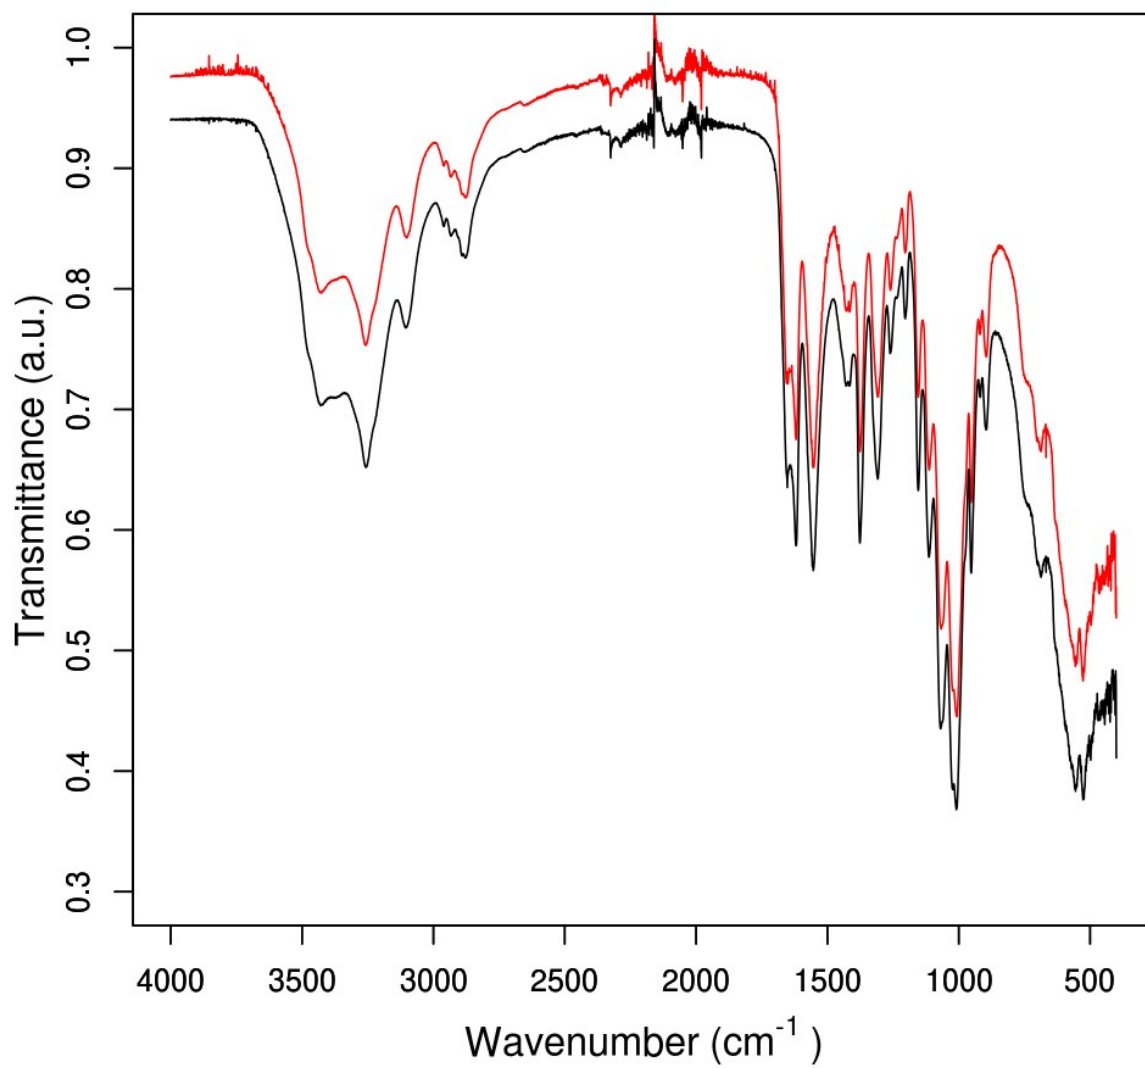

**Supplementary Figure 1 B:** ATR-FTIR spectra of chitin (black) and p-nitrophenol loaded chitin (red) powders.

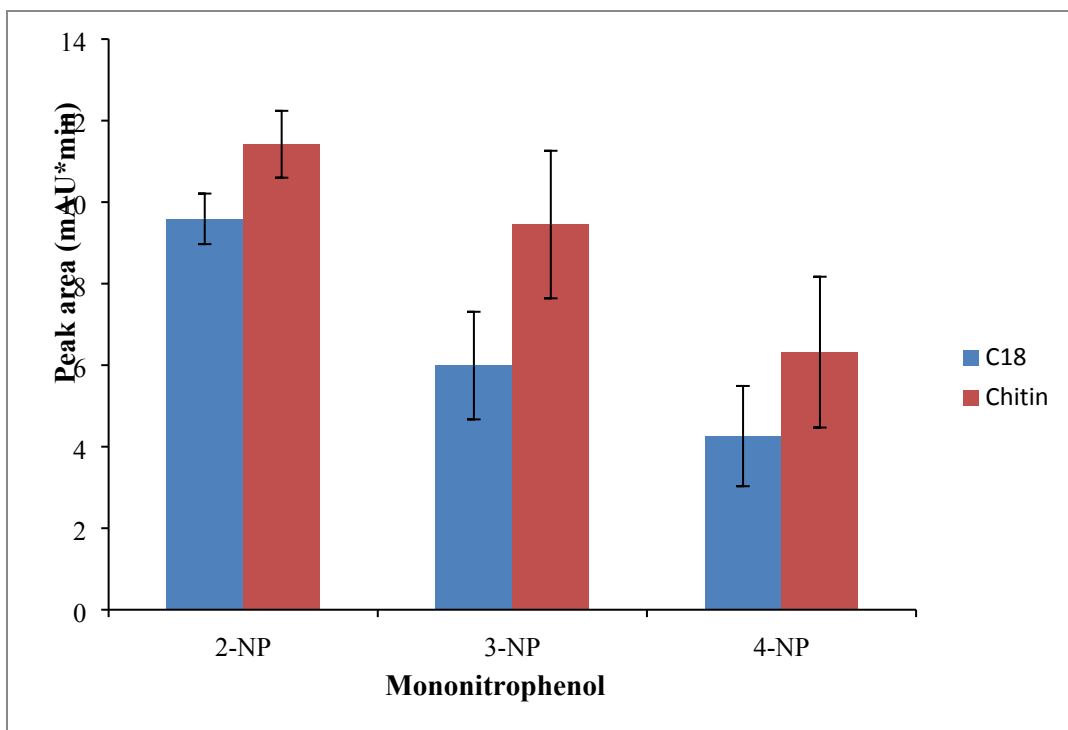

Supplementary Figure 2 A| Comparison of C18 and chitin as sorbent

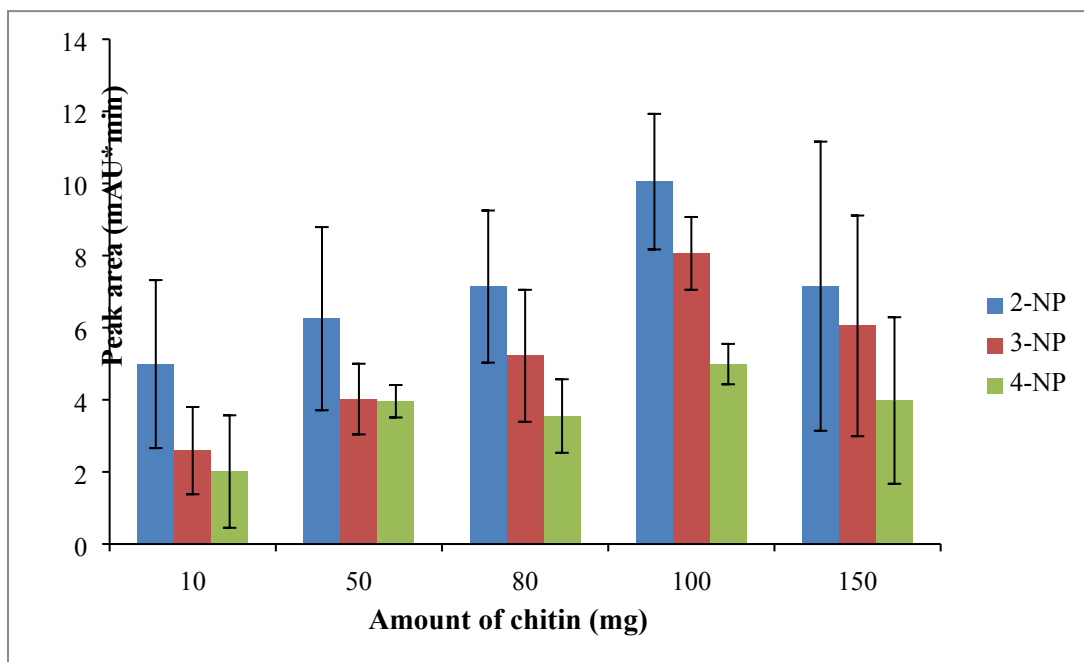

Supplementary Figure 2 B| Effect of chitin's amount in SPE procedure.

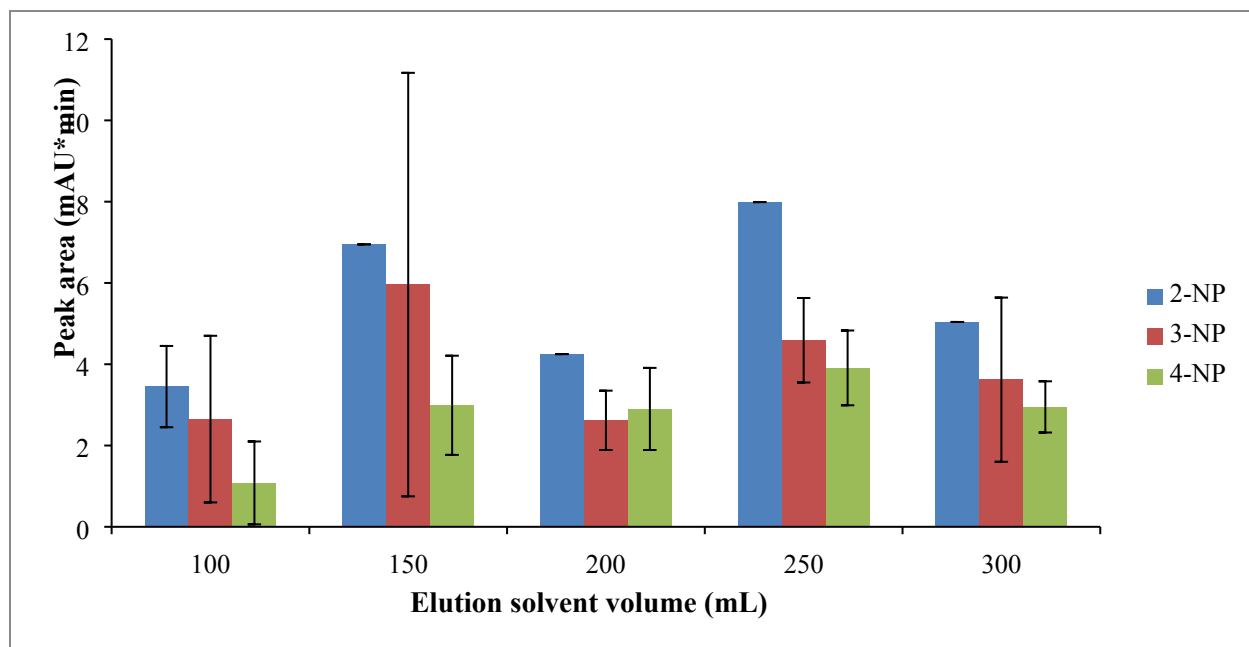

Supplementary Figure 2 C| Effect of eluent volume in SPE procedure.

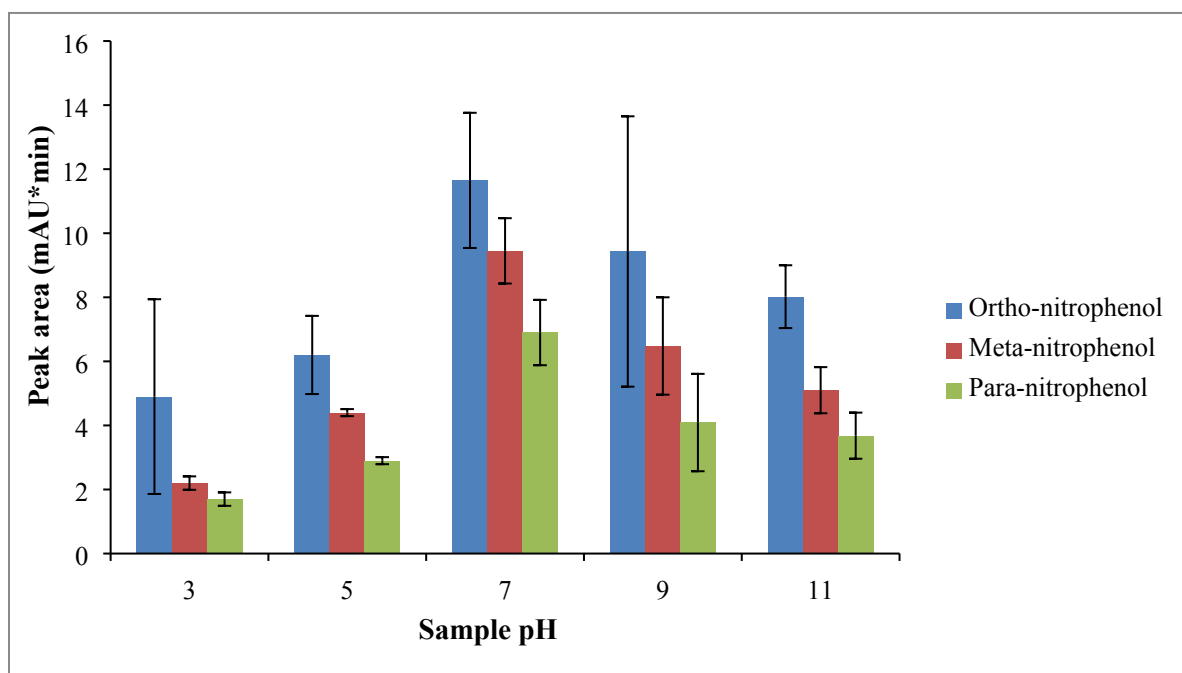

Supplementary Figure 2 D| Effect of sample pH in SPE procedure.

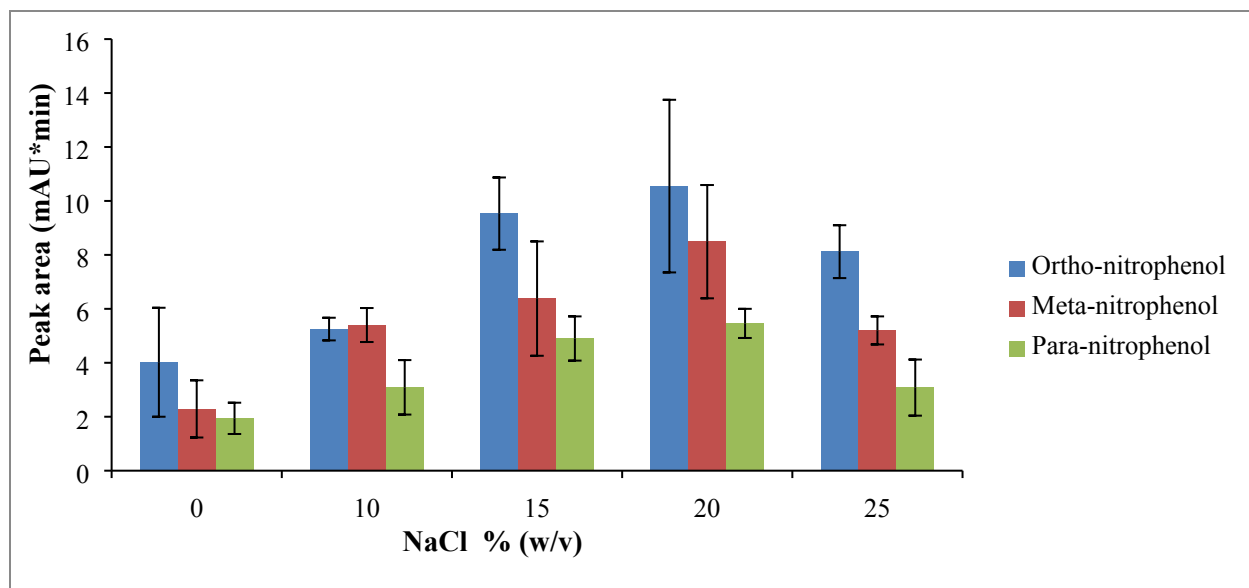

**Supplementary Figure 2 E** | Effect of ionic strength of sample solution in SPE procedure.

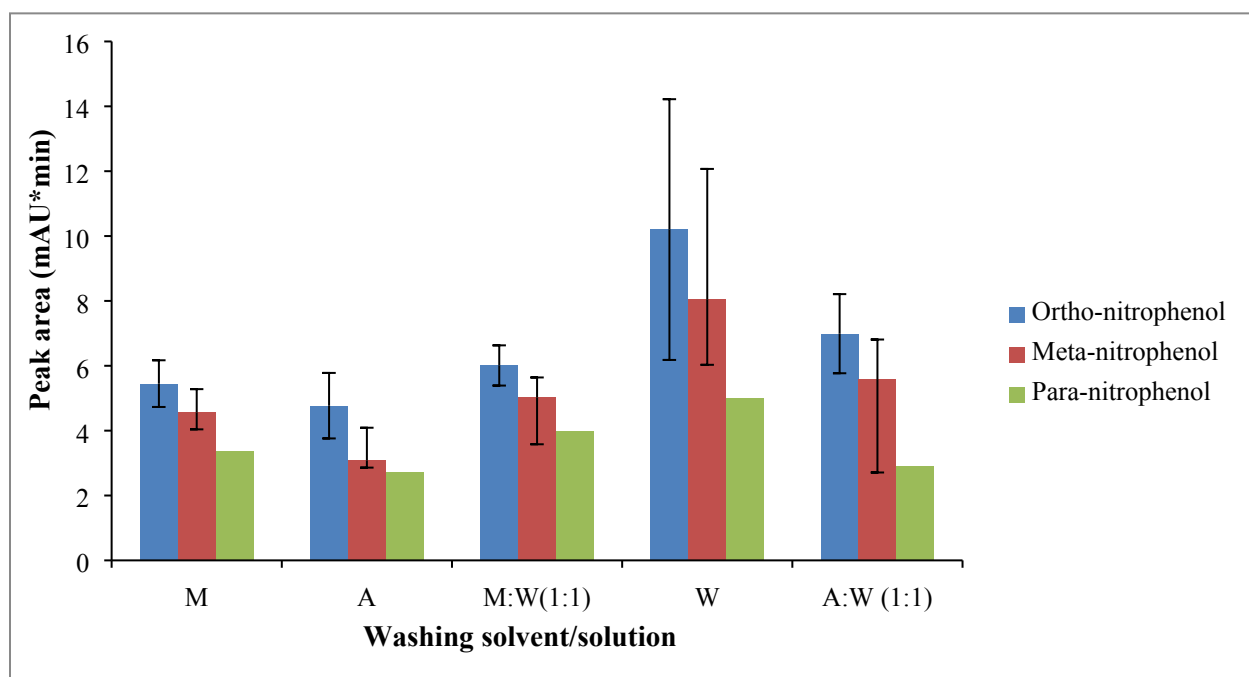

**Supplementary Figure 2 F** | Effect of washing solvent/solution in SPE procedure.

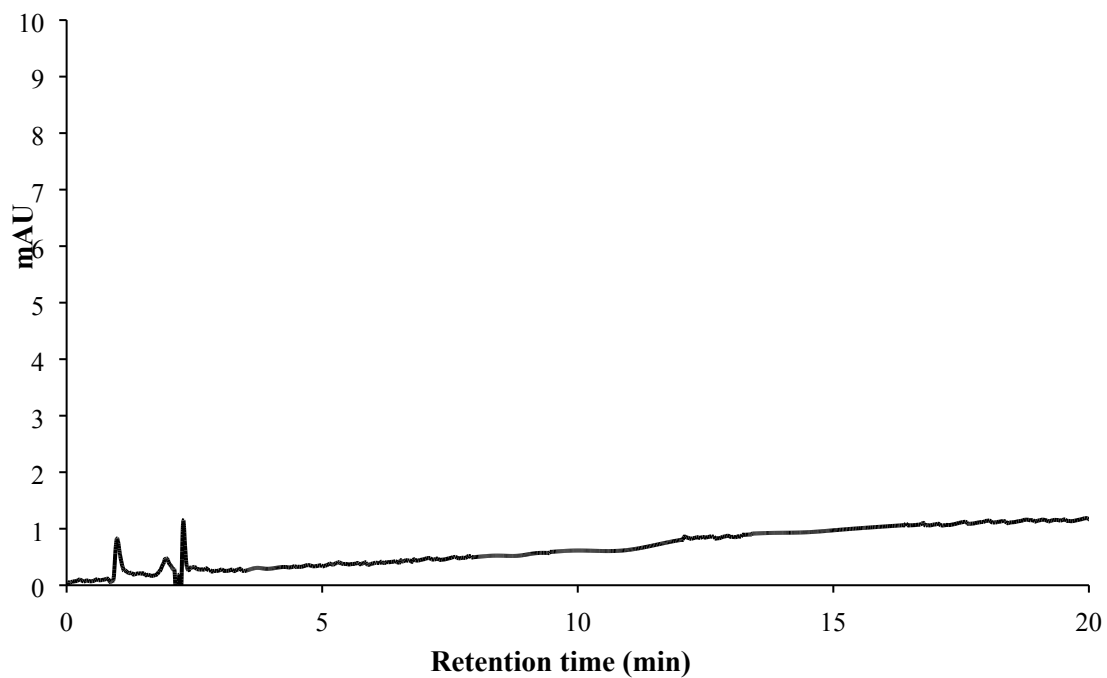

**Supplementary Figure 3 A** | SPE-HPLC-UV chromatogram of control sample.

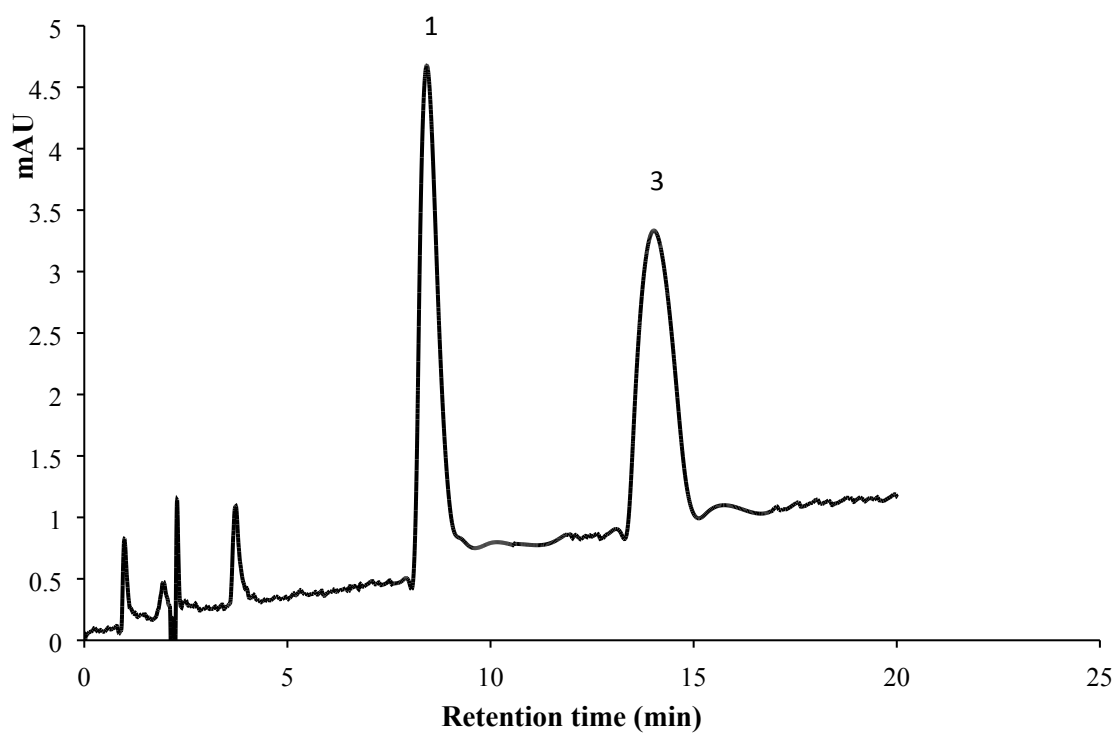

**Supplementary Figure 3 B** | SPE-HPLC-UV chromatogram of Industrial waste water-2.

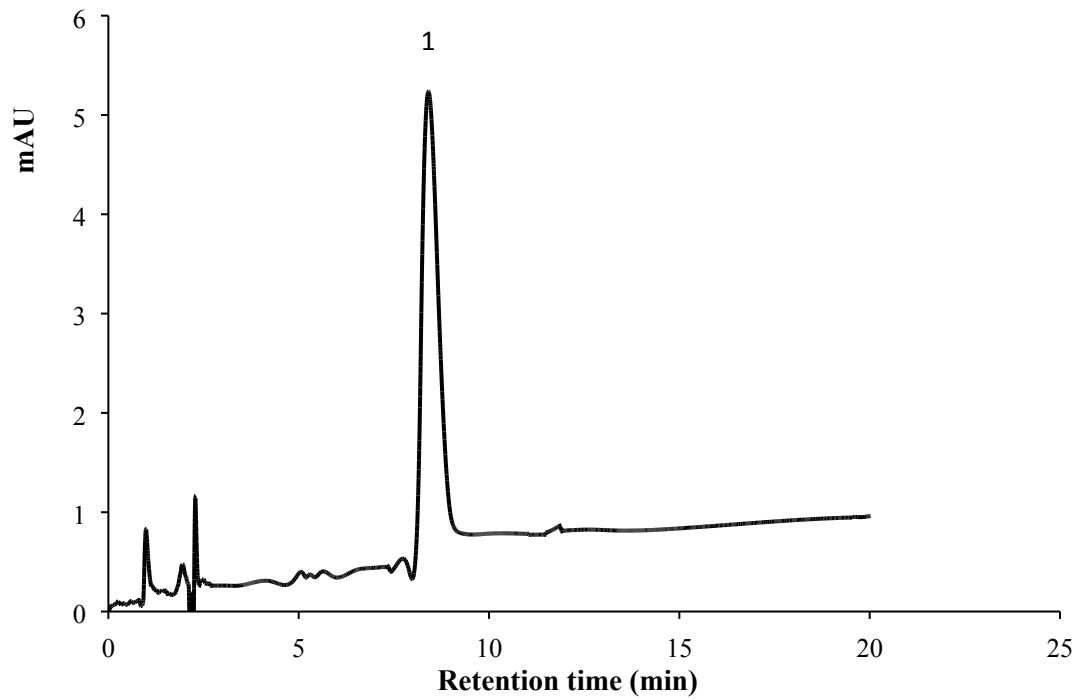

**Supplementary Figure 3 C** | SPE-HPLC-UV chromatogram of Agricultural runoff-2.
